# Supplementary material for: Association between Sex Hormones and Erectile Dysfunction in Men without Hypogonadism
Source: Research Square preprint supplement (doi:10.21203/rs.3.rs-4056715/v1), 2024-03-25
Supplement: Supplementary file 1 [file 6d3832d5a1f087ce124189cd.docx]

**Table S2 Multiple linear regression analyses for serum plasminogen activator inhibitor-1 levels**

|  | Unstandardized  coefficients | | Standardized  coefficient | t | *P* value |
| --- | --- | --- | --- | --- | --- |
| B | SE | β |
| Constant | 58.57 | 5.240 |  | 11.18 | <0.001 |
| Age | -0.267 | 0.079 | -0.182 | -3.379 | 0.001 |
| Hypertension | 6.613 | 2.514 | 0.145 | 2.631 | 0.009 |
| Diabetes mellitus | 9.289 | 3.788 | 0.126 | 2.452 | 0.015 |
| Testosterone | -0.019 | 0.006 | -0.165 | -3.331 | 0.001 |

SE, standard error.
